# Supplementary material
Source: publisher figshare collection journal article supplement (https://frontiersin.figshare.com/ndownloader/files/28911168)
Supplement: Supplementary file 1 [file 28911168]

Supplementary Material

**Description**

This supplement includes details on data, methods, data processing, as well as figures and tables related to our work on the Himalchuli seismic swarm.

The Supplementary Figure S1 describes the Magnitude-time history of earthquakes in the trace of the Gorkha earthquake and in the trace of the Himalchuli swarm.

Figure S2 zooms on the time histogram of the local events in 2017 and 2018, illustrating the time structure complementarily to Figure 2.

Figure S3 illustrate the density maps of the seismic events located by the NSC network.

Figure S4 shows an example of waveforms of seismic events detected by template matching taking into account cross-correlation value >0.5. Figure S5 illustrates waveforms of one detected event around P and S phases for several channels. Table S1 is the number of events in the catalogs obtained respectively by manual processing at NSC and applying template matching processes with the final parameters that were retained.

We then describe the methodology used for testing synthetic catalogues, a method we used to determine the robustness of the hypocentral locations and the influences of the biases induced by the network geometries. Figure S6 illustrates the results of hypoDD relocation of synthetic data taking into account type of uncertainties and network configurations.

The kinematics of the source of the events of the seismic swarm being unknown, we tried to determine the focal mechanisms of a selection of the largest earthquakes. We describe the attempts and results we obtained. We finally illustrate both the polarities picked on samples of seismograms and stereoplot of results on Figure S7.

A supplementary table and Figure S8 respectively enumerate and illustrate the satellite images of the local landforms and geological structures that were confronted with the local seismicity.

The last part of the supplementary material illustrates the 2 methods used to calculate the Coulomb Failure Stress variations on the fault related to the regional and local straining related to the surface loads.

The method which is used to calculate the influence of the global and regional load on the fault is detailed and illustrated by Figure S9, S10, S11 and S12.

The method used to calculate the influence of the local surface load is then detailed, and the results are illustrated by Figure S13.

| 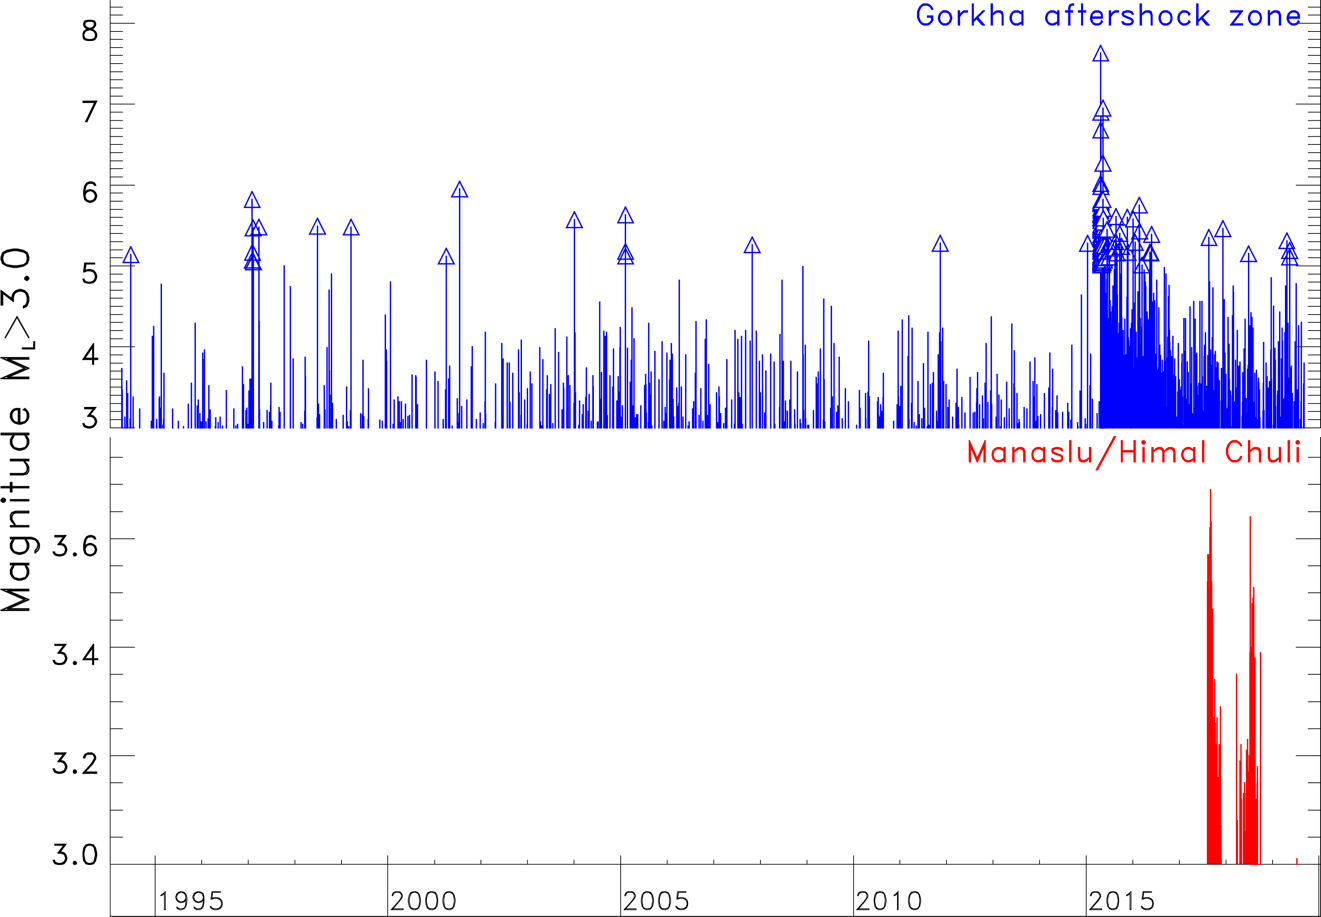 |
| --- |
| **Figure S1:** Magnitude Time history of different clusters:  The blue and red bars correspond respectively to the magnitude-time plot of the seismic events located in the trace of the Gorkha rupture and in the Himalchuli region. |
|  |
| 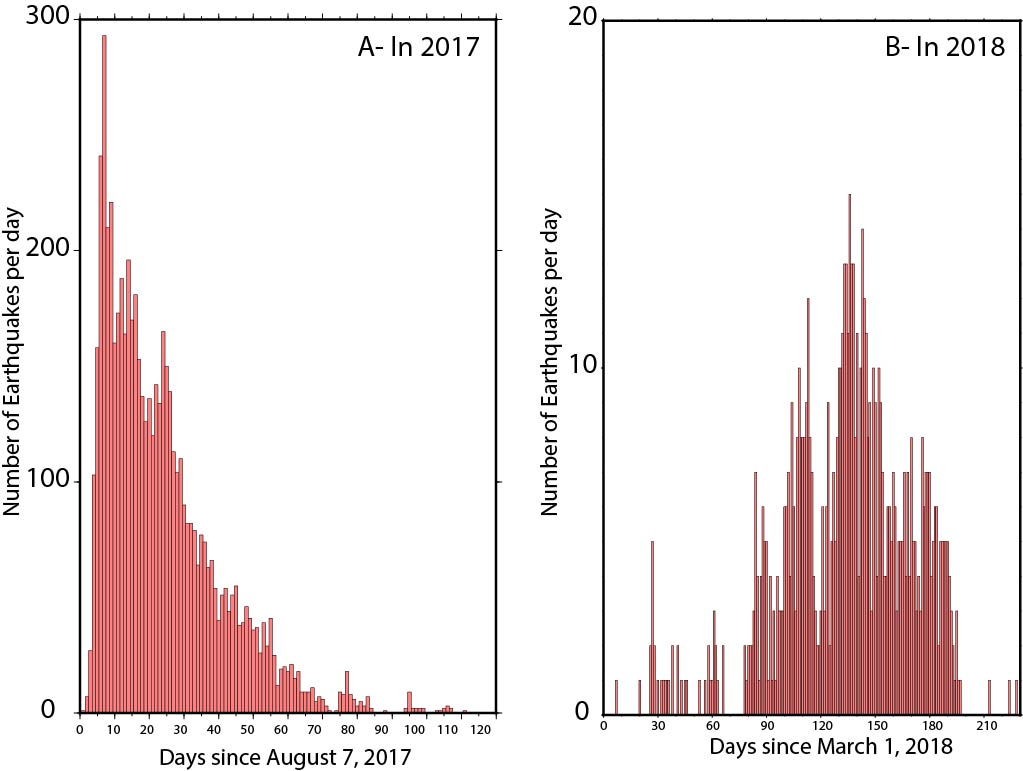  Figure S2: Number of earthquakes of the seismic swarm located per day with the NSC network only. Left (A) in 2017, since 7 August, right (B) in 2018, since 17 May 2018.  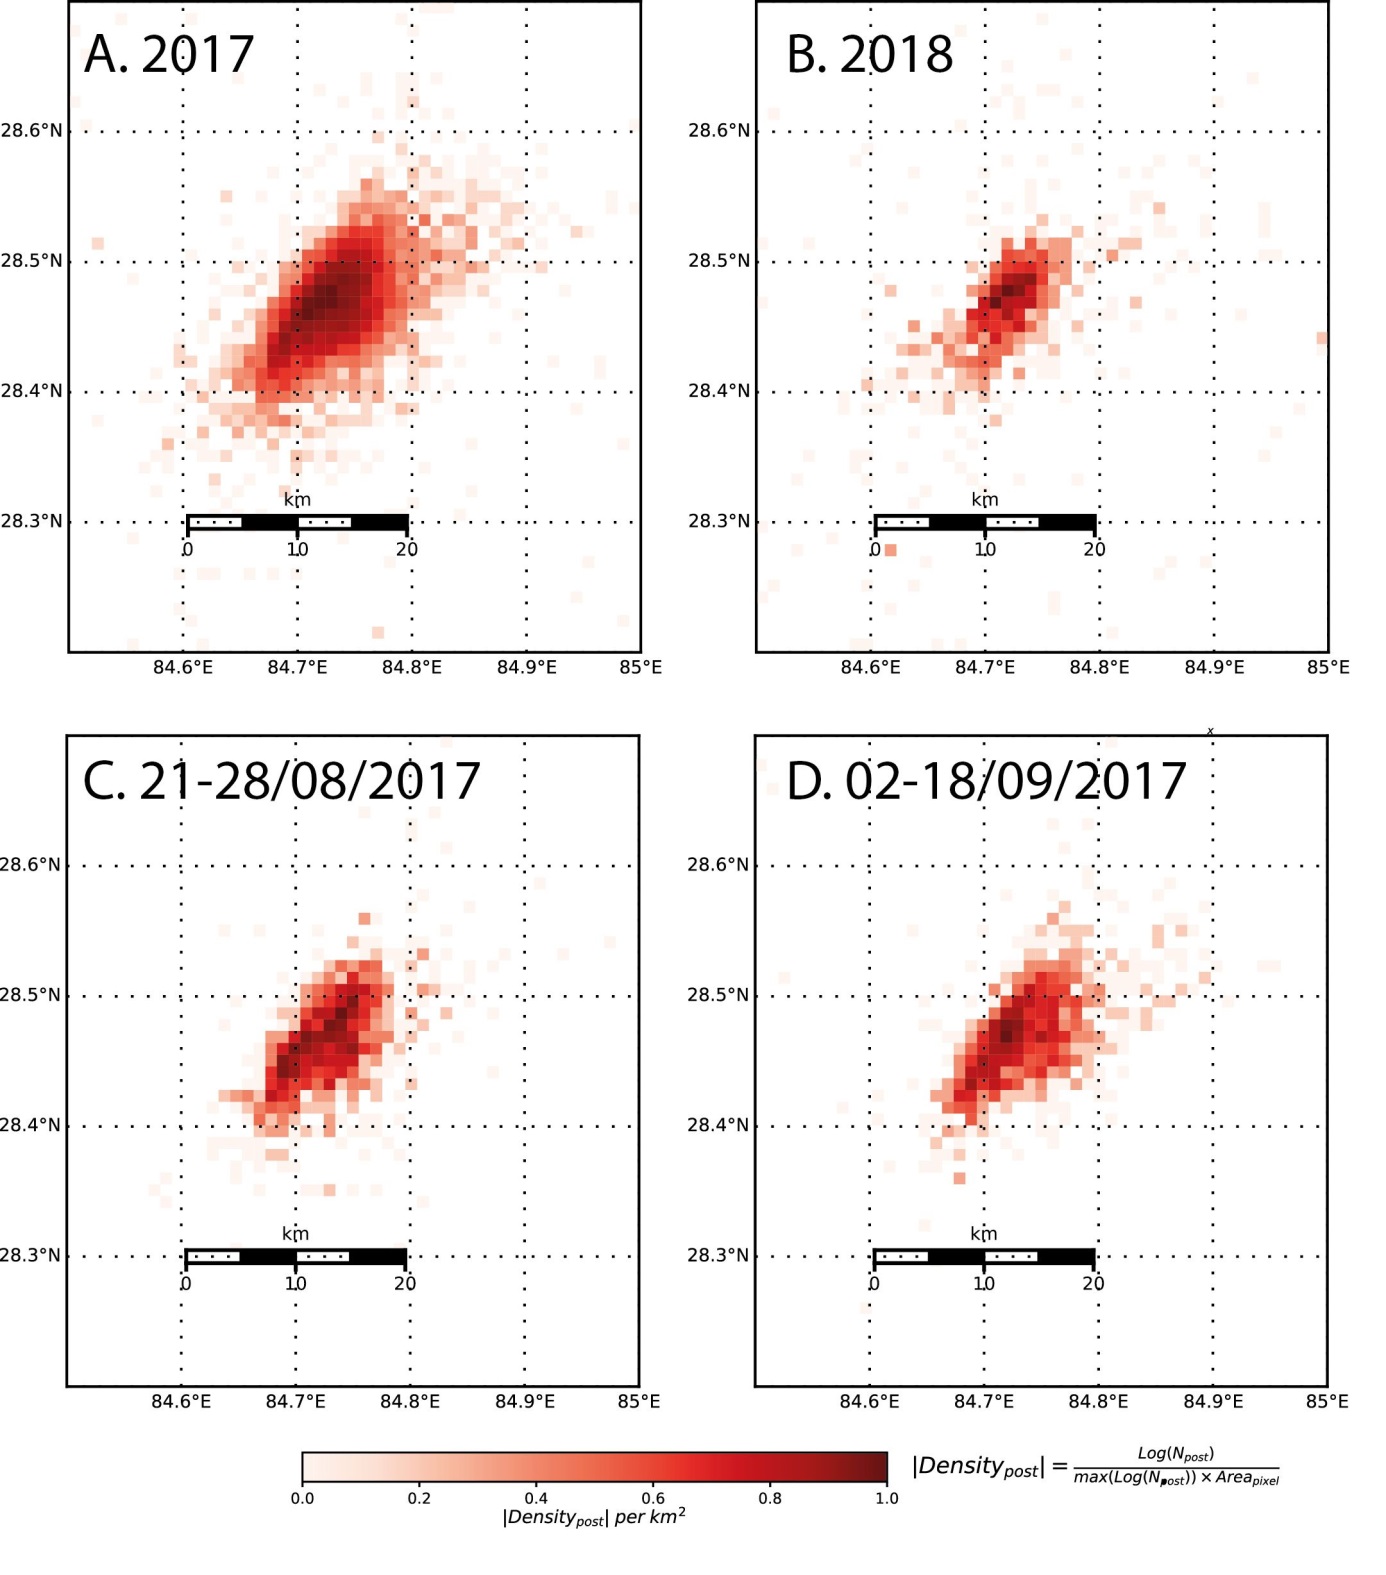Figure Figure S3 : Density maps of seismic events located by NSC network (a) in 2017, (b) in 2018, (c) between August 21 and 28 2017 - period of acquisition at PROK temporary station (d) between September 2 and 18 2017 -period of acquisition of JML. The density is computed as the normalized log of the number of events per km².  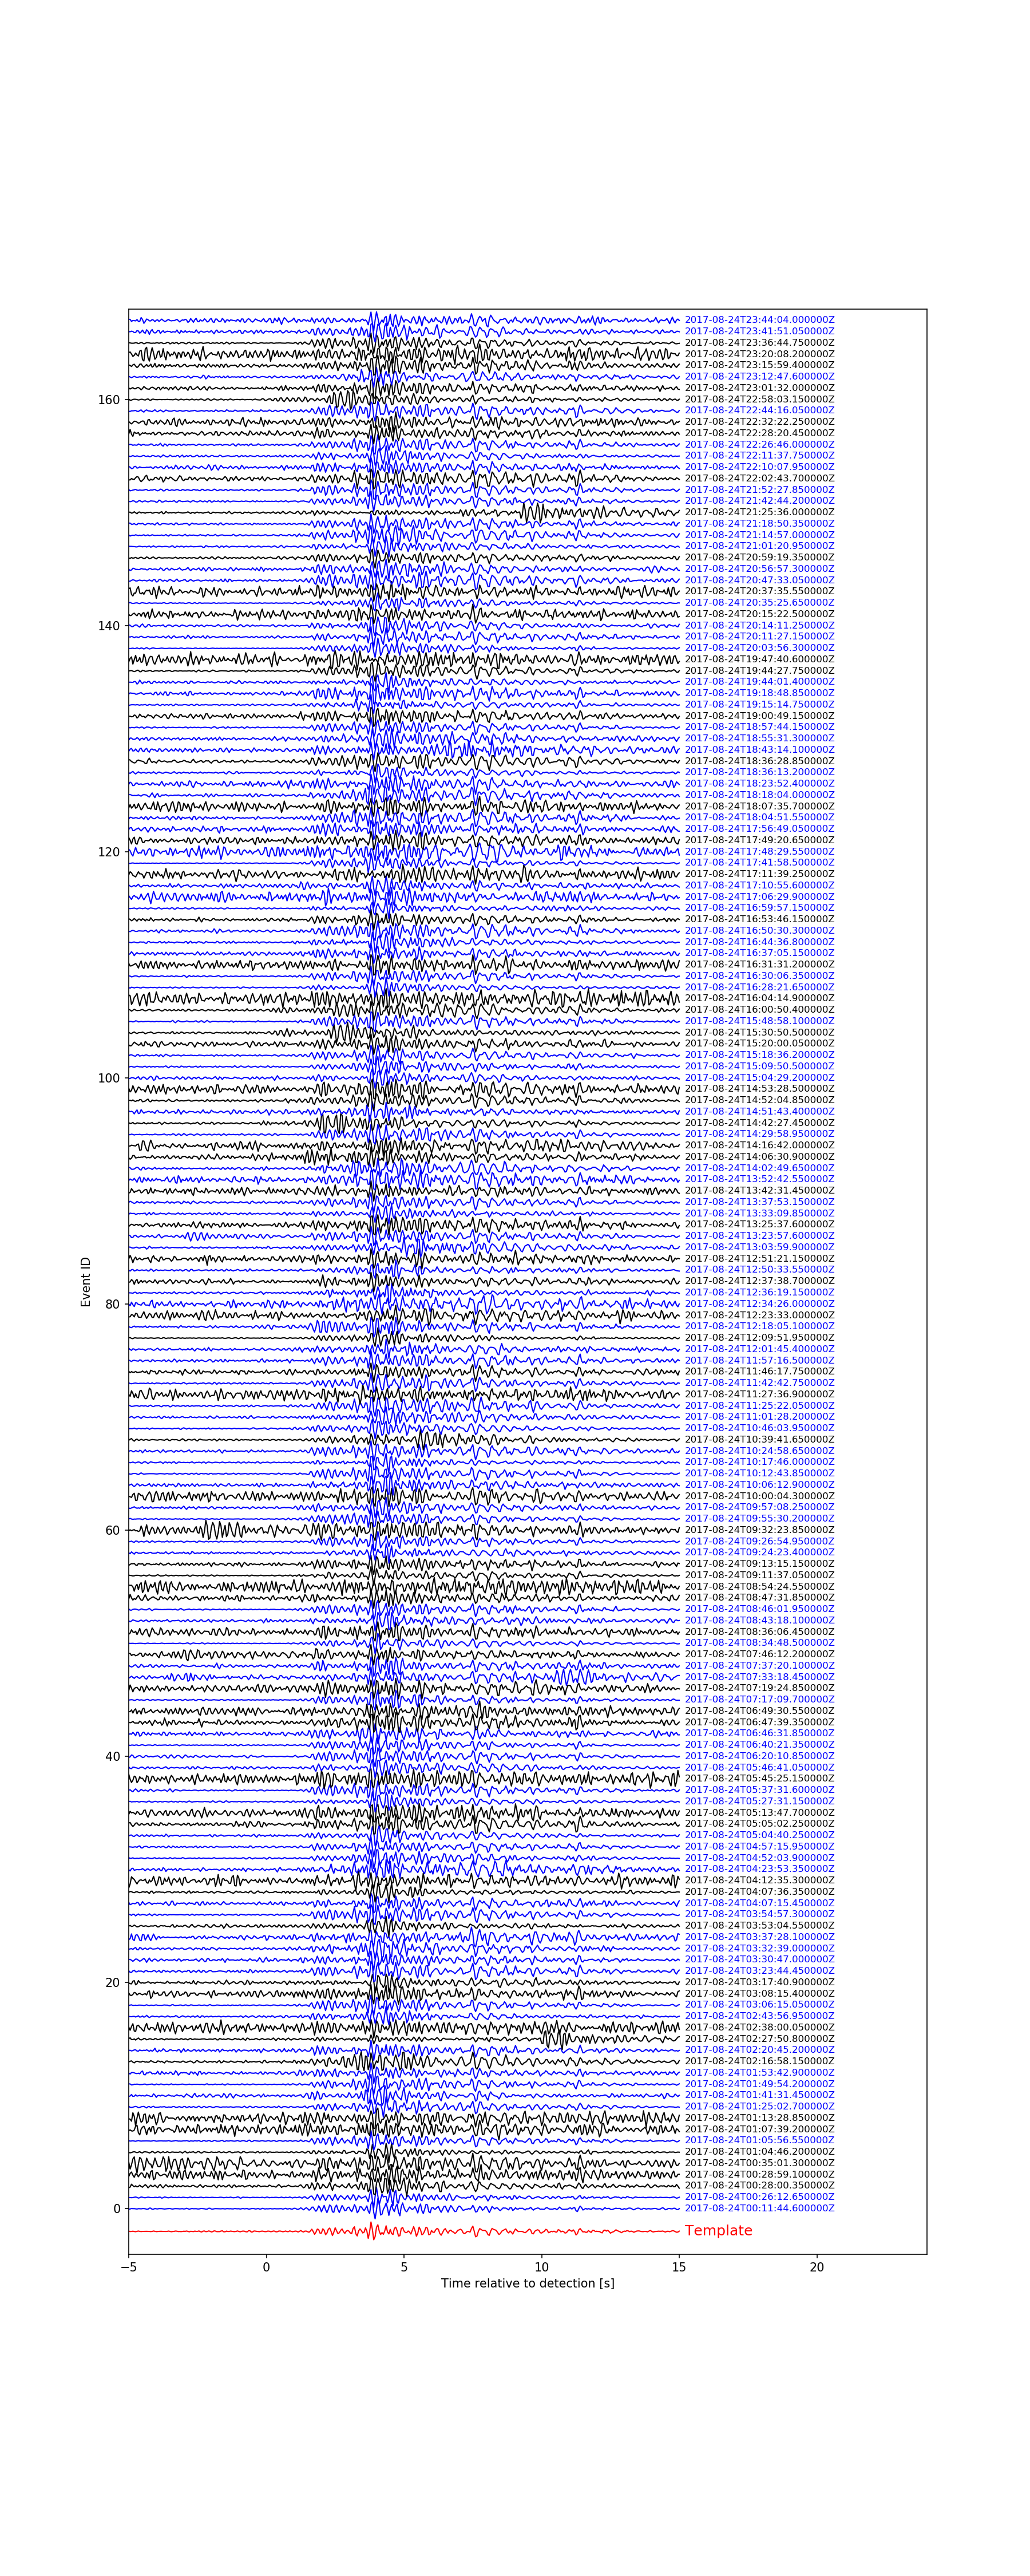 |
| **Figure S4:** Seismograms of some events of the swarm detected using template matching for a given template shown in red (Station PROK, channel Z). Blue seismograms show the events already present in the NSC catalog and black seismograms show new events which were not in the NSC catalogue. |
| 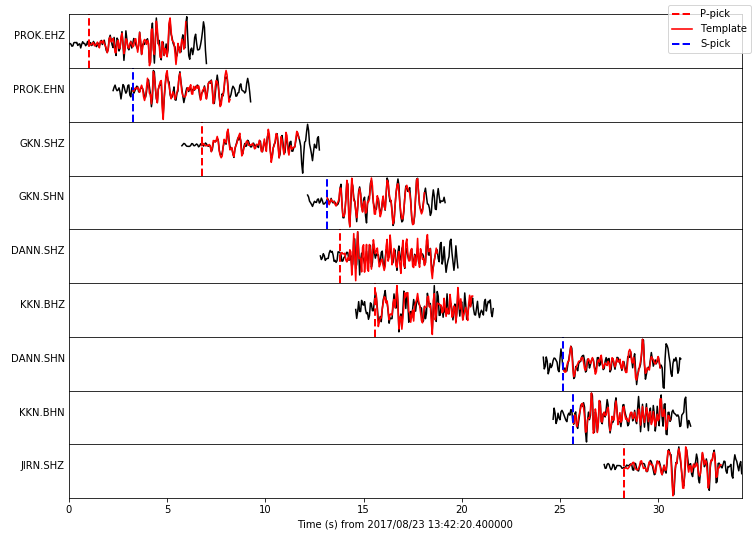 |
| **Figure S5:** A sample of template in red, overlapping waveforms of a detected event (black) on 2017/08/23 @ 13:42:20 UTC. Red dash line corresponds to the P-picks while blue dashed line points on the S phase. |

| **Julian Day (2017)** | **Total number of events detected after template matching** | **Total number of events in NSC catalog** | **Number of events detected by template matching located using >= 9 phases** |
| --- | --- | --- | --- |
| **235** | 248 | 157 | 122 |
| **236** | 217 | 137 | 117 |
| **237** | 235 | 129 | 115 |
| **238** | 235 | 137 | 119 |
| **239** | 218 | 121 | 109 |
| **240** | 213 | 145 | 100 |
| **241** | 216 | 135 | 105 |
| **242** | 218 | 168 | 124 |
| **257** | 76 | 54 | 49 |
| **258** | 73 | 42 | 31 |
| **259** | 89 | 52 | 54 |
| **260** | 87 | 56 | 52 |
| **262** | 83 | 51 | 49 |
| **263** | 106 | 56 | 48 |
| **264** | 94 | 39 | 36 |
| **265** | 96 | 40 | 44 |
| **266** | 84 | 45 | 38 |
| **267** | 68 | 41 | 42 |
| **268** | 63 | 36 | 34 |
| **269** | 60 | 37 | 27 |
| **270** | 62 | 26 | 25 |
| **271** | 57 | 39 | 35 |
| **272** | 56 | 29 | 22 |
| **273** | 63 | 42 | 35 |
| **Total events** | **3017** | **1814** | **1532** |

**Supplementary Table S1:** Number of events detected and selected as a function of the Julian day. On average the number of events detected by template matching is 67% larger than the number of events detected and picked in the NSC bulletin. Only 50% of these events were associated with more than 8 phases and are considered as high quality events.

## Synthetic tests

Synthetic tests were performed in order to determine the robustness of the hypocentral locations and estimate influence of the biases induced by the network geometries. We generated synthetic catalogues of earthquakes, taking into account the average time and spatial uncertainties associated with the events manually picked and located by NSC analysts. The synthetic events were then relocated using a double-difference scheme under HypoDD, considering the three seismic network geometries available during the seismic crisis (i.e., with 7 closest NSC stations, with PROK and NSC, with JL1-3 and NSC, see Fig. S6).

Four synthetic catalogues of 800 events were generated. Originally, the events are equi-distributed within a sphere of radius 5 km. In the first synthetic catalogue, we associated no time nor spatial locations uncertainties (Fig. S6, column 1). In the second, we associated to every event a randomly distributed average time uncertainty of 0.1 s for P and 0.2 s for S phases (Fig. S6, column 2). These time uncertainties were estimated from the comparison between picks performed by independent analysts of a subset of events located in the Himalchuli area. In the third (Fig. S6, column 3), we randomly modify the initial location of the synthetic events with longitude, latitude and depth uncertainties respectively set at 3 km, 8 km, 10 km, according to the average uncertainties determined in the NSC bulletin. In the fourth (Fig. S6, column 4), we associated with every event both time and spatial uncertainties. Every catalogue is then relocated according to our relocation scheme in HypoDD.

| 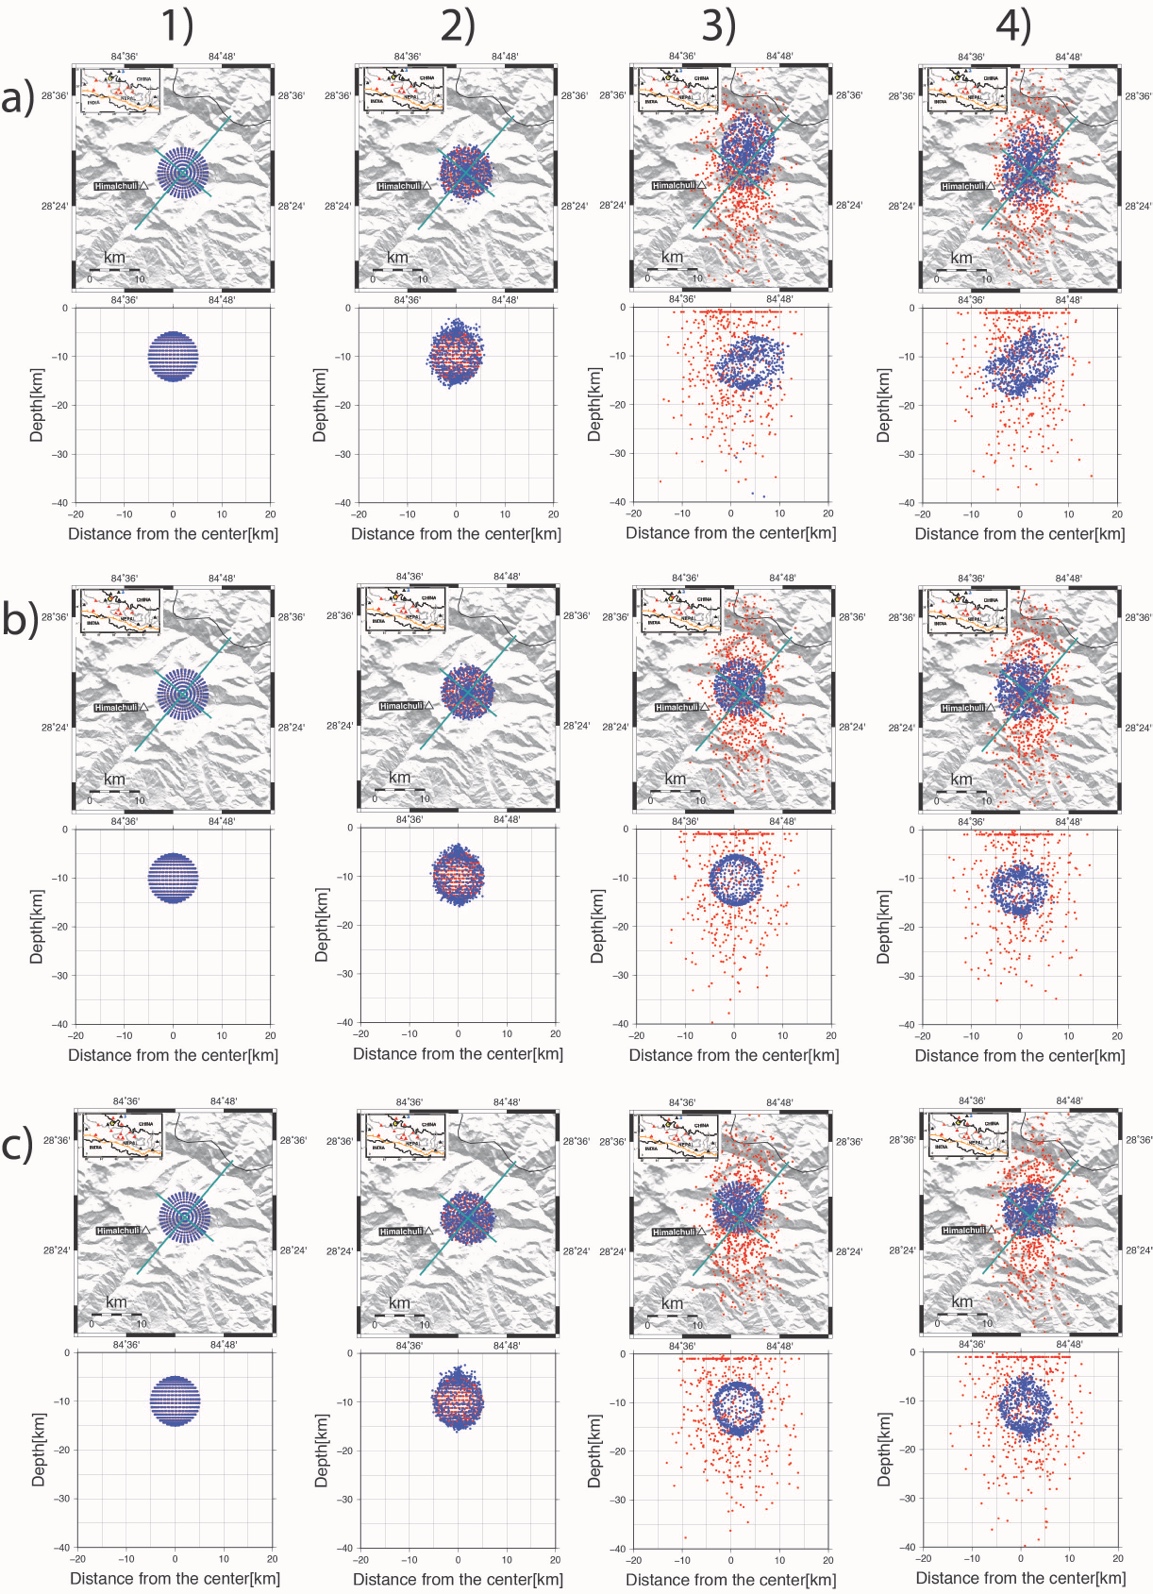 |
| --- |
| **Figure S6**: HypoDD relocation of synthetic events. red: original location of the events  blue: relocated events. Column 1: synthetic events – no uncertainties 2: with picking time uncertainties, 3: with initial location uncertainties, 4: with both time and location uncertainties. Row a/ with only 7 closest NSC stations used for the location of earthquakes, b/with PROK complementing NSC stations, c/ with JL1-3 in addition to NSC stations. Used stations shown as red triangles in the inset figures. |

**Focal mechanisms**

We first tried a waveform inversion at regional distances for a list of 5 of the largest earthquakes that occurred during the crisis in 2017. None were recorded at teleseismic distances. Their signals at KKN, the nearest permanent broadband station installed 90 km from the cluster, were not good enough for a waveform inversion.

We therefore picked and documented the first motion polarities of the direct P-wave. For most of the largest earthquakes selected, the signals are not very impulsive and the polarities are difficult to ascertain. Furthermore, for all of them, the distribution of the polarities on the focal sphere is far from optimal, due to the large azimuthal gap, the range of hypocentral distances covered by the stations and the shallow depths of the earthquakes. Besides, earthquakes of the swarm are located at shallow depths (frequently <5km) resulting in a complex radiation pattern around the earthquake source.

However, the idea was to validate or invalidate possible fault geometries based on the observed polarities. Considering that earthquakes of one same swarm would be all located on a single fault and resulting from a characteristic tectonic movement, we would assume to find a common mechanism for all earthquakes of the Himalchuli seismic swarm. This assumption would result in a repeating, either positive or negative, direction of the first motion polarity for all earthquakes at one station. For two of the largest events of the swarm (the MLv 3.5 and 3.1 that occurred in 2017, resp. on August 26th and August 29th), we estimated five polarities of the P-wave. Finally, two of them, estimated at DANN and JIRN stations, are contradicting from one event to the other (Figure S7).

| 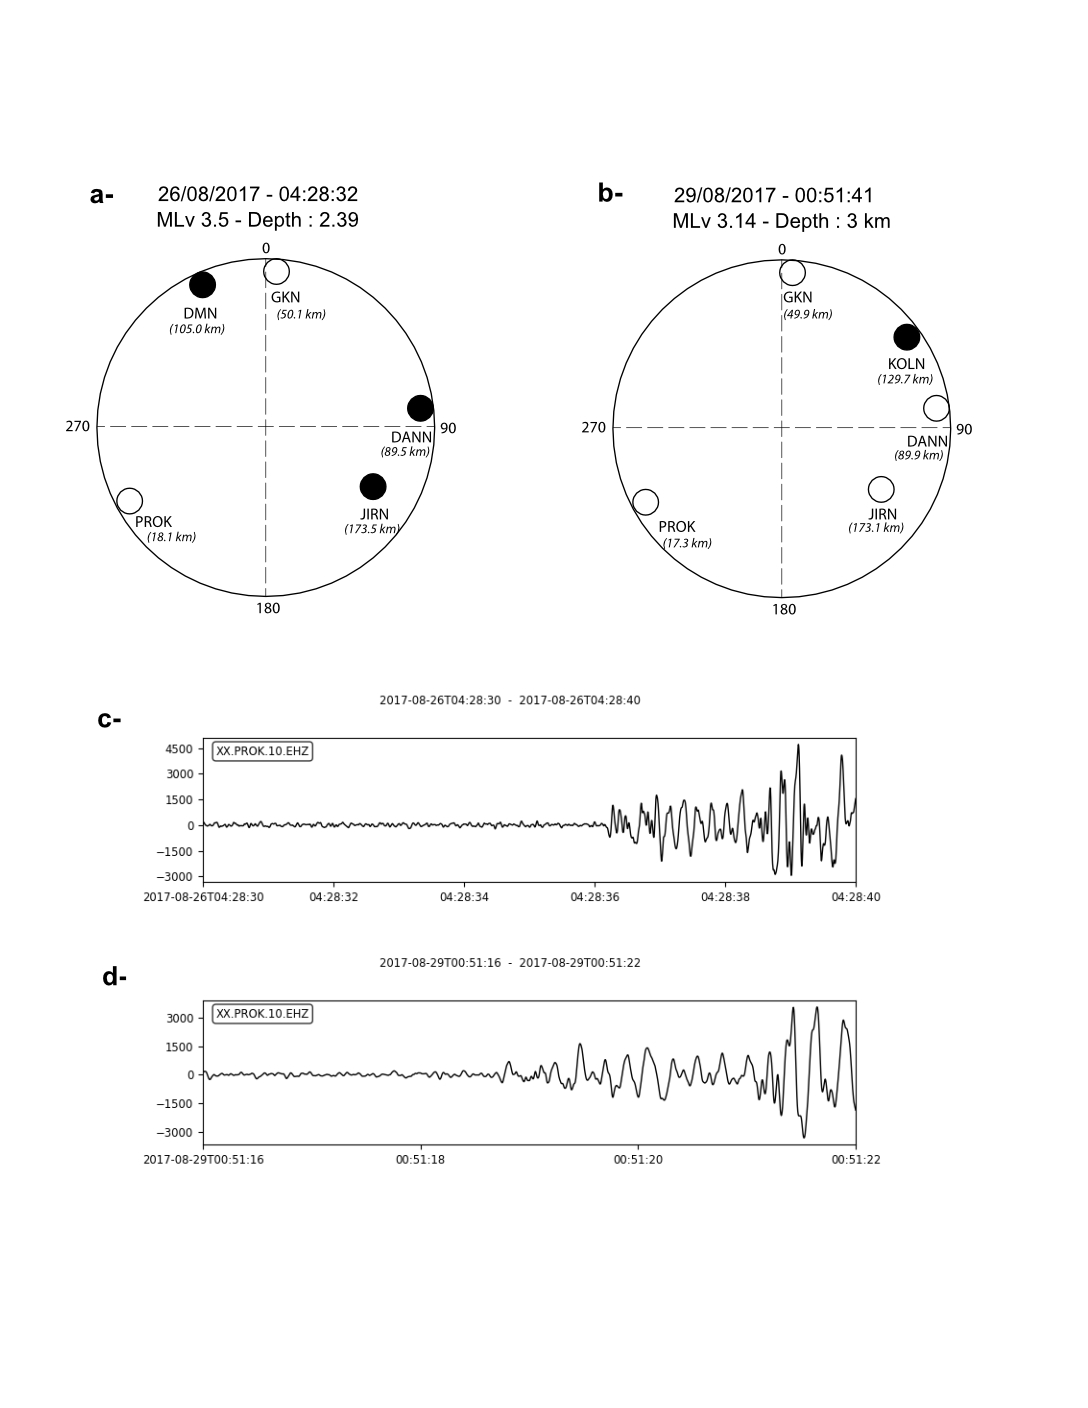 |
| --- |
| **Figure S7** : First motion polarities of the direct P-wave projected on the lower focal sphere for two of the largest events within the Himalchuli seismic swarm (a) Event of MLv 3.5 occurring on 2017, August 26th (b) Event of MLv 3.1 occurring on 2017, August 29th. Full circles represent a compressive/positive polarity and empty circles represent a dilatational/negative polarity. Signals of the same two events recorded on the vertical component of the closest station (PROK) zoomed on the onset of the P-wave presenting respectively: (c) a relatively impulsive dilatational (negative) polarity (d) an emergent negative polarity. |

**Imagery**

We visually inspected the images available under GoogleEarth™ and under the world’s imagery map from the ArcGIS™ Wayback imagery of the world, “a digital archive providing users with access to the different versions of World imagery created over time”. The images on which we focused our attention are listed below:

| Source | Acquisition Date | Resolution |
| --- | --- | --- |
| Geoeye (Ikonos) | 22/01/2009 | 1 m |
| Digital globe WV01 | 09/12/2009 | 0,5m |
| Digital globe (GE1) | 30/12/2011 | 0,46 m |
| Maxar (WV03) | 20/10/2017 | 0,31m |

The best images available in google earth™ in the area were acquired on 30/05/2014 and the 21/02/2016.

We compared the images acquired before / after the Gorkha earthquake and the swarm’s development. Note that no good image was available posterior to 20/10/2017. We had a look first in the immediate vicinity of the seismic swarm (the black box on Figure S5b corresponds to the area where the seismicity of the third week of August 2017 was relocated) as well as along the whole valley that develops along the southern slopes of the Himalchuli mountain range.

All the images are freely available, have been accessed on April 26 2021 for the last time, and will allow the reader to access the data we used. Figure S8 illustrates one of these acquisitions. Bedding, schistosity, fabrics are visible in multiple zones despite the snow and ice coverage.


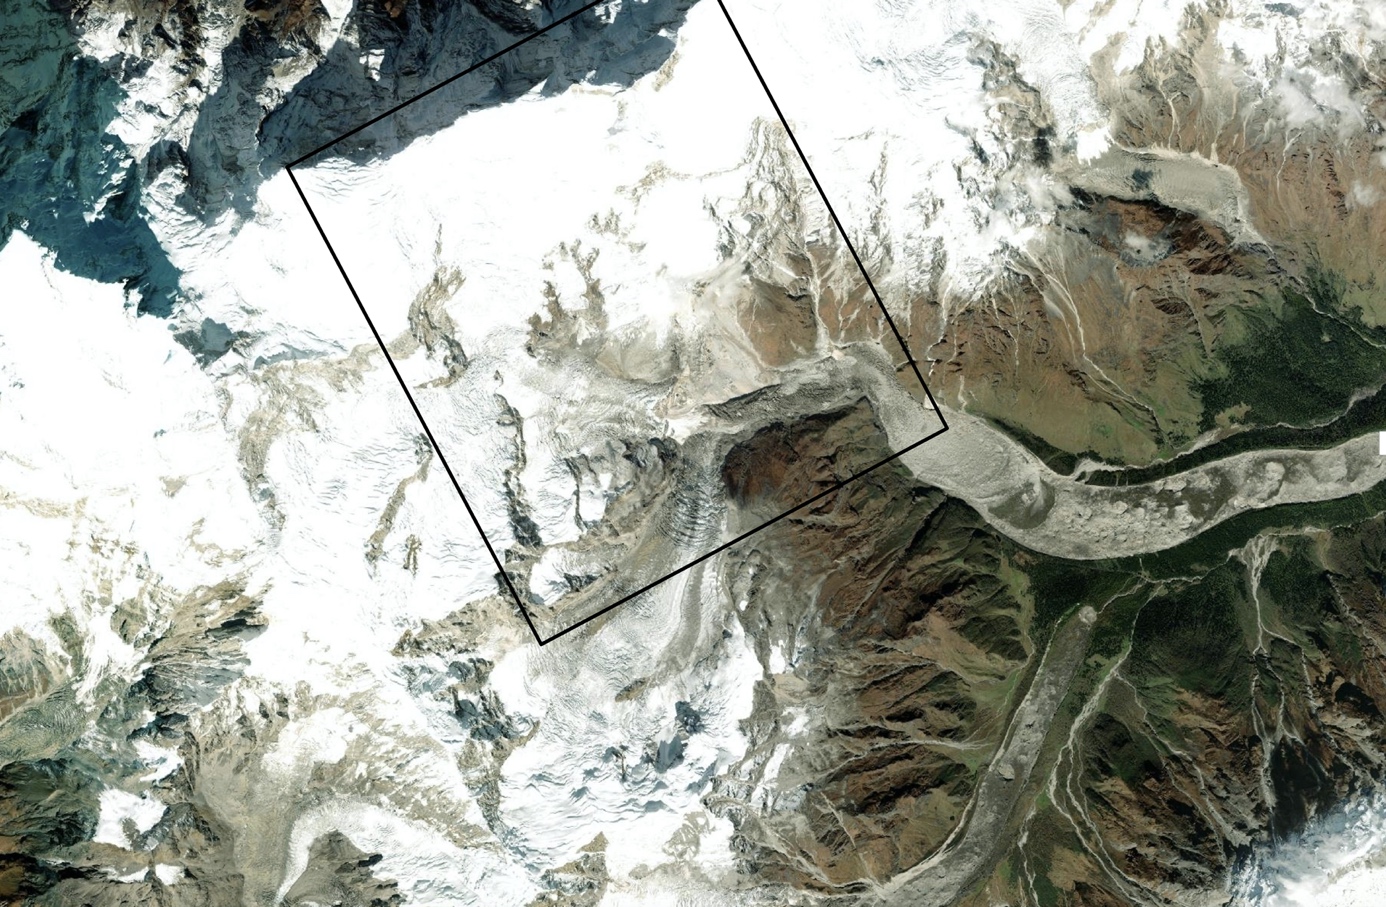
 Figure S8: Maxar (WV03) image @ 0,31m resolution acquired on the 20/10/2017. Black box corresponds to the area where the seismicity of the third week of August 2017 was relocated. The full resolution is freely available at <https://livingatlas.arcgis.com/wayback/> and on Bing maps https://www.bing.com/maps.

**Method 1: Modelling the solid Earth response to global and regional surface loads**

We compute surface displacements, strain and stress fields induced by variations of surface loading derived from GRACE using a numerical model based on the load and the Love numbers theory. We compute surface displacements, strain and stress induced by a unit load for each spherical harmonic of a decomposition of the GRACE derived load by solving equations describing the elastic deformation of a self-gravitating spherical Earth. We then combine results for each spherical harmonic to obtain surface displacements, strain and stress fields induced by the global surface loading at a given time, longitude, latitude, and depth.

We use a continental Preliminary reference Earth model (CRUST 2.0) to compute load, Love numbers, and Green’s functions for displacements, strain, and stress induced by unit harmonic loading function and then convolve results with the GRACE-derived load from 2002 to 2017. After 2012, the quality of the GRACE data deteriorates (large data gaps, increase in the noise level), and we therefore choose to adjust an annual and semi-annual fit to the 2002-2012 period and propagate it to the time of the seismic swarm following the 2015 Gorkha earthquake (Figure 3).

The value of the Young’s modulus used in the elastic half-space model is E=90 GPa. This value was obtained by Chanard et al. (2014) to best-fit the amplitude of the observed seasonal horizontal displacement field as a response of variations in GRACE-derived surface loading. The value represents an average of the Young’s modulus over depths sensitive to the surface loading, related to the wavelength of the load considered. Note that the Young’s modulus best explaining the seasonal vertical displacement field is E=170 GPa, reflecting the differences in Green’s functions for horizontal and vertical surface displacements as a response to surface loading.

For the sake of consistency, we consider the same values for both regional -long wavelength - and local -short wavelength – loads, and chose E=90 GPa.

Stress variations at depth are computed using the full stress tensors at location (longitude: 84.705, latitude: 28.43), on a range of fault planes consistent with the seismic swarm at a 10 km depth (strike N080-N100, dip 70N-90N), from the GRACE-derived load. Note that considering the wavelength of the load, stresses do not vary significantly within the crust, so stress computations will not be significantly affected by variations in the swarm depth. We compute change in Coulomb stress (CFS) as an indicator of the fault susceptibility to failure under annual stresses derived from GRACE. CFS, positive in tension by convention, is given by ,with and the shear and normal stresses derived from the GRACE load, respectively, and the friction coefficient. Note that we use : its value changes the amplitude of CFS, not the general features of results, as illustrated on Figure S12 on which CFS are calculated with a friction coefficient of 0.1 and 0.4.

Changing the value of the Young’s modulus discussed above, affects the amplitude of the stress variations, rather than changing the features of the time series, and does not modify our conclusions.

**Figure S9:** Daily detrended Global Navigation Satellite System station position time series and associated 1-𝜎 error bars (gray), for station CHLM (Nepal). Black crosses are 10 days moving average of the daily observations. The red line shows the displacements derived from GRACE (Chanard et al. 2018).

a)
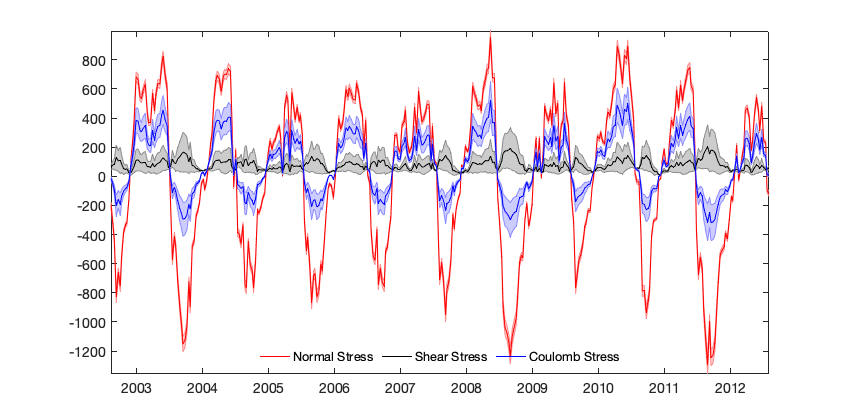


b)
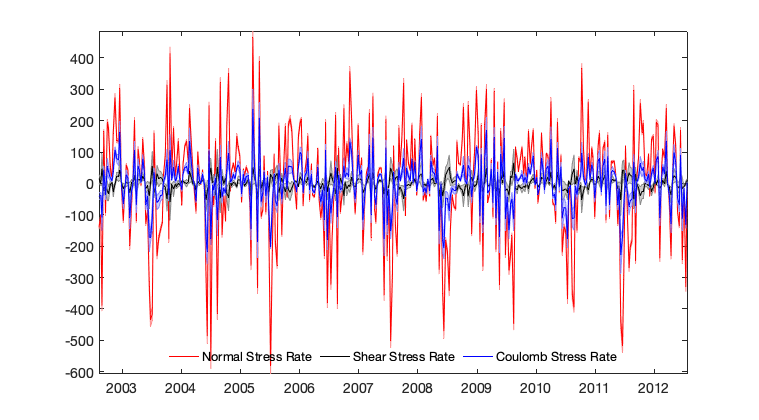


**Figure S10:** GRACE derived (a) stress (in Pa) and (b) stress rate variations at location 84.705E 28.43N, on a range of fault planes consistent with the seismic swarm at 10 km depth (strike N080-N100, dip 70N-90N). Mean normal (red), shear (black) and Coulomb Failure (blue) stress and stress rate for all fault planes considered are given with their associated standard deviations.


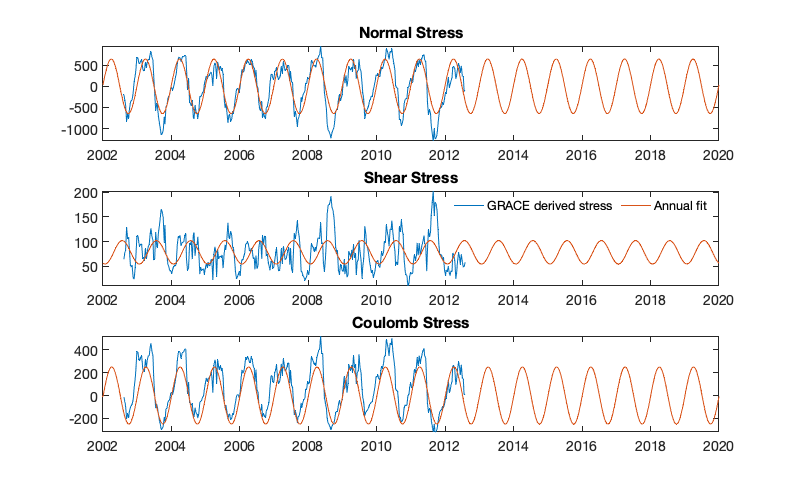


**Figure S11:** GRACE derived normal, shear and Coulomb stress calculated at 84.705E 28.43N, at 10 km depth for a fault plane strike N090, dip 80N (blue). An annual least square fit is performed on the period 2002-2012 where the quality of GRACE data is the best, and propagated for a longer time series.

Figure S12: GRACE derived Coulomb stress calculated at 84.705E 28.43N, at a 10 km depth for a fault plane strike N090, dip 80N, and for a friction coefficient of 0.4 (blue) and 0.1 (red). Changing the value of the friction coefficient affects the amplitude of the stress variations, rather than changing the features of the time series.

**Method 2: Calculation of the static stress fields induced by a local surface loading**

We compute the static stress fields induced by estimates of the local surface snow load on the Himalchuli or Manaslu mountain ranges using the Boussinesq solution. Stress components induced by a point load H at the surface of a 3D semi-infinite elastic solid of Cartesian coordinates (x,y,z), z positive downward are given by:

Where is the distance between the point load and a point of coordinates where stresses are computed, at and . are the Lamé parameters characterizing the elasticity of the medium. These parameters are related to the Young modulus and Poisson ratio by: and . We use and in our model.

In this linear elastic framework, the full stress tensor induced by any surface load distribution is given by summing stress components obtained by individual point loads at the surface.

We then compute the Coulomb Failure Stress (CFS) as an indicator of the fault susceptibility to failure under estimates of the surface snow loading the Himalchuli and/or Manaslu mountain ranges at 6 km elevation, assuming that a 1 meter Water equivalent snows on the peaks. CFS, positive in tension by convention, is given by ,with and the shear and normal stresses, for a range of fault planes compatible with the observed seismicity (strike N080-N100, dip 70N-90N) at 10 km depth, derived from the snow load, and the friction coefficient. Note that we use : its value changes the amplitude of CFS, not the general features of results.

a)

b)

c)

**Figure S13:** Depth profiles of maximum stress component induced by localized snow loads over the Himalchuli (a) or Manaslu (b) mountain ranges. Stresses are computed using the Boussinesq’s solution for a surface point load, convoluted with the load. Fault setting is described and used to evaluate Coulomb Failure Criterion (c) at 10 km depth, for steeply dipping plane consistent with the seismic swarm (strike N090; dip 80N), and a friction coefficient of 0.4, for both loads and a combination of the two.
